# Supplementary material for: Evolutionary and natural history of the turtle frog, Myobatrachus gouldii, a bizarre myobatrachid frog in the southwestern Australian biodiversity hotspot
Source: PLOS journal article supplement (doi:10.1371/journal.pone.0173348), 2017-03-15

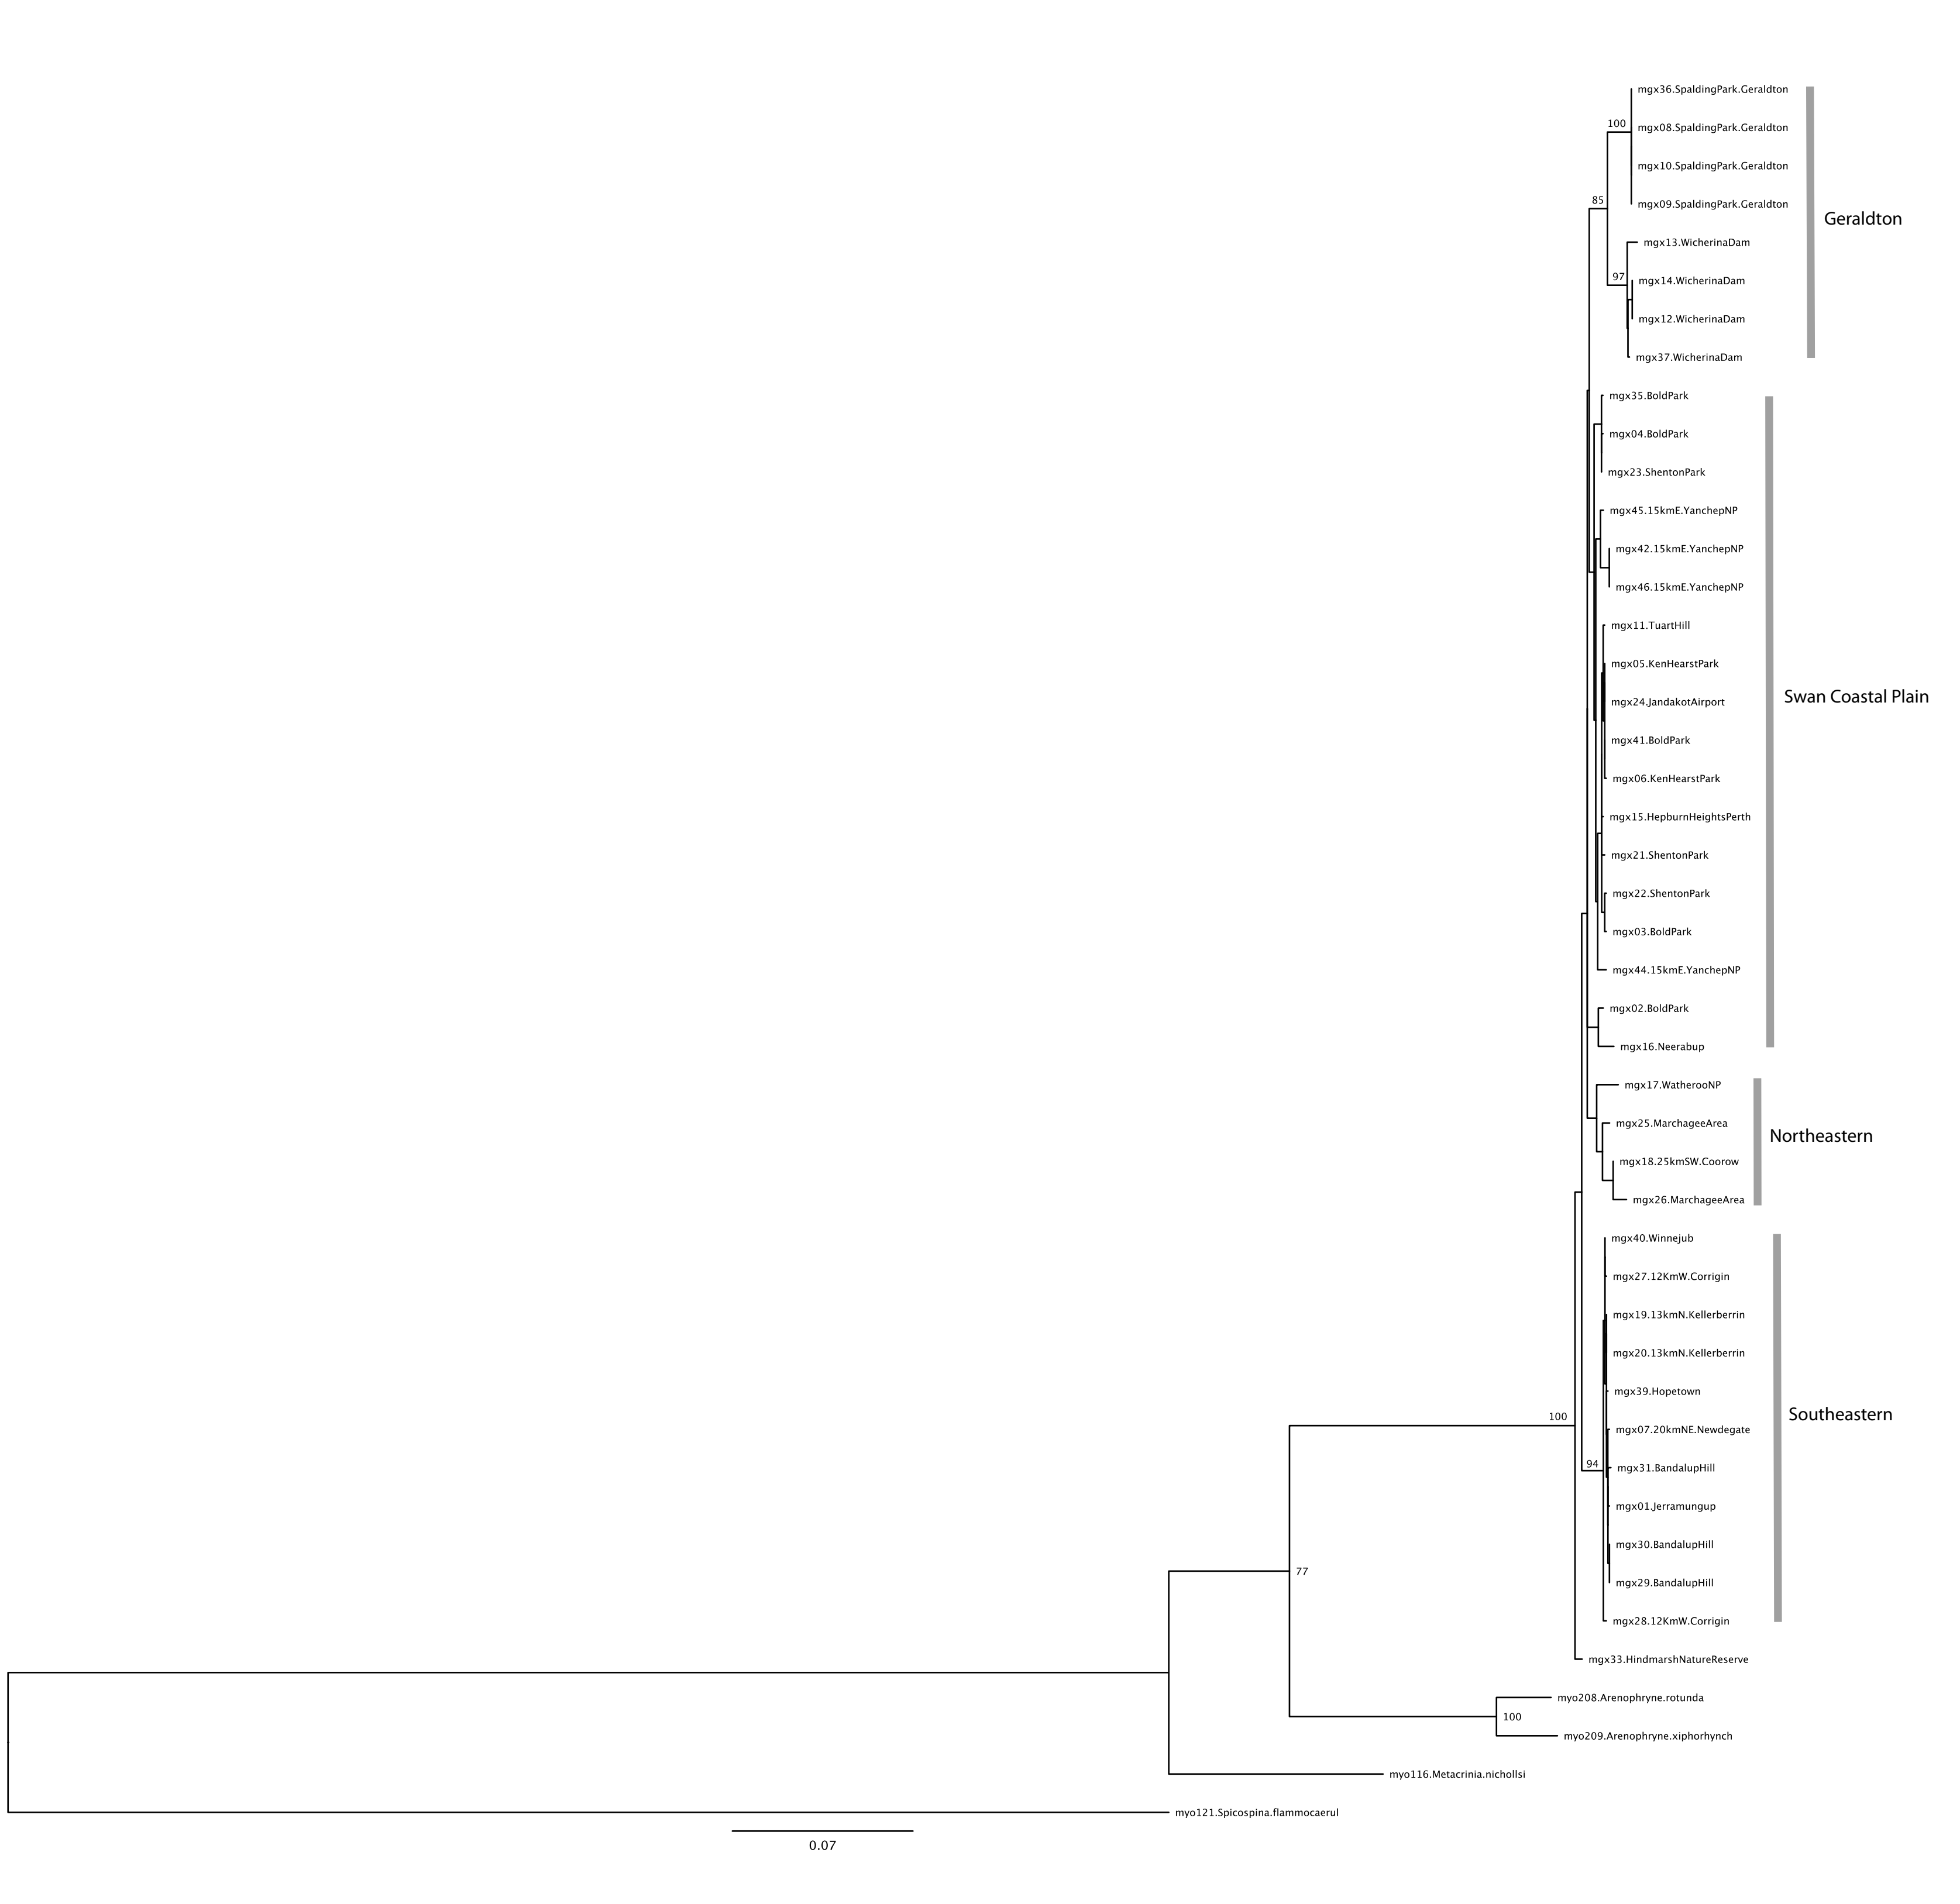

Supplement: S3 (10.1371/journal.pone.0173348.s003) [file journal.pone.0173348.s003]
